# Supplementary figures and images for: Care Provision and Prescribing Practices of Physicians Treating Children and Adolescents With ADHD
Source: Atypon-hosted journal article supplement (doi:10.1176/appi.ps.201600130), 2017-02-15

Figure1: Cohort Selection

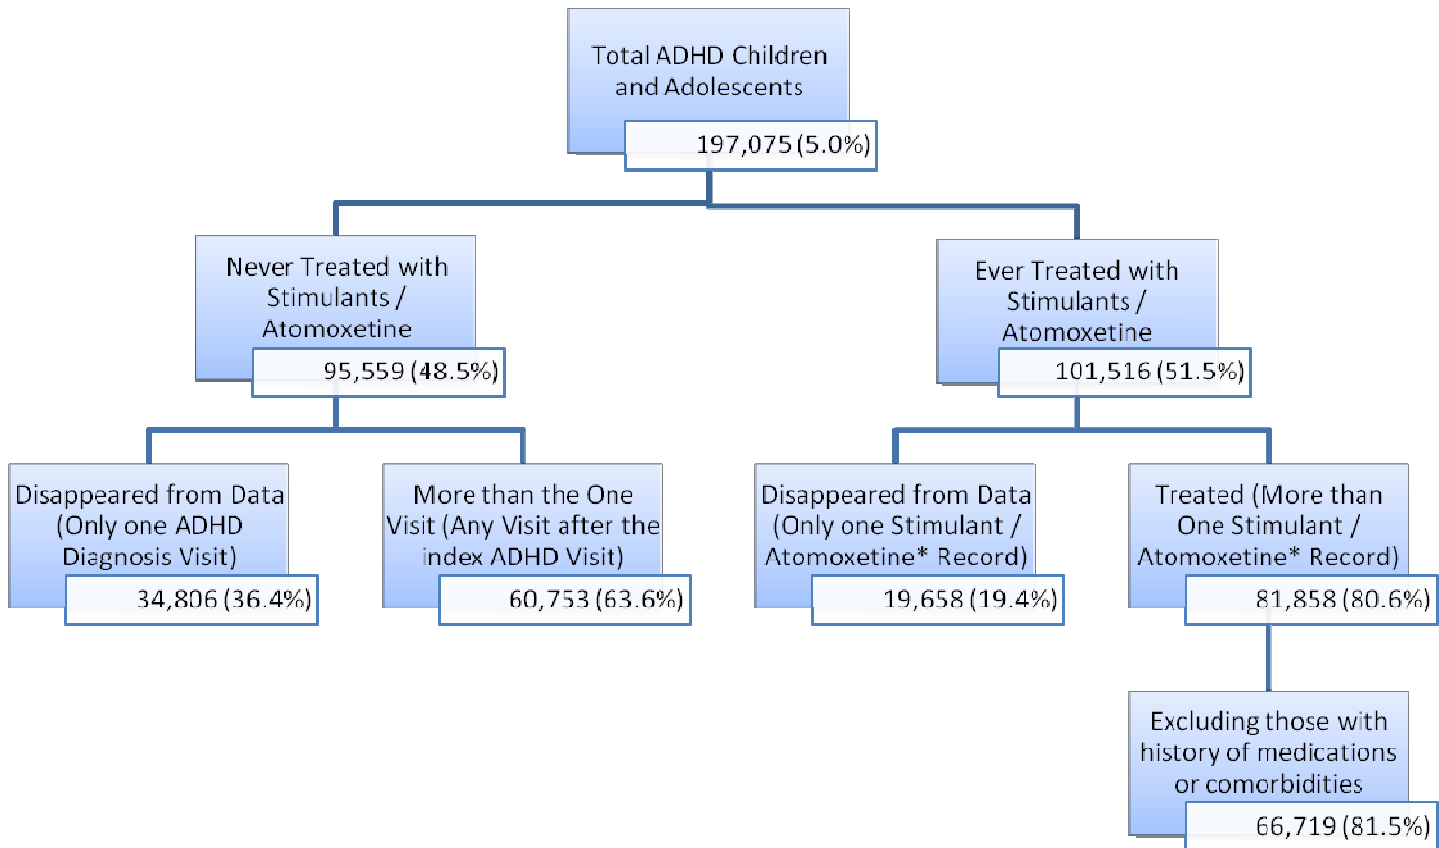

Supplement: appi.ps.201600130.ds001.pdf [file appi.ps.201600130.ds001.pdf]
